# Supplementary material for: Facile synthesis of novel tunable highly porous CuO nanorods for high rate lithium battery anodes with realized long cycle life and high reversible capacity
Source: Royal Society of Chemistry journal article supplement (doi:10.1039/c2nr31898a), 2012-01-01
Supplement: c2nr31898a.pdf [file c2nr31898a.pdf]

## Electronic Supplementary Information

### Facile Synthesis of Novel Tunable Highly porous CuO Nanorods for High Rate Lithium Battery Anode with Realized Long Cycle Life and High Reversible Capacity

Linlin Wang,<sup>a</sup> Huaxu Gong,<sup>a</sup> Caihua Wang,<sup>a</sup> Dake Wang,<sup>a</sup> Kaibin Tang<sup>\*a</sup> and Yitai  
Qian<sup>a,b</sup>

Division of Nanomaterials and Chemistry Hefei National Laboratory for Physical  
Sciences at the Microscale. Department of Chemistry, University of Science and  
Technology of China, Hefei 230026, P.R. China. E-mail: kbtang@ustc.edu.cn. Phone:  
86-551-3601791.

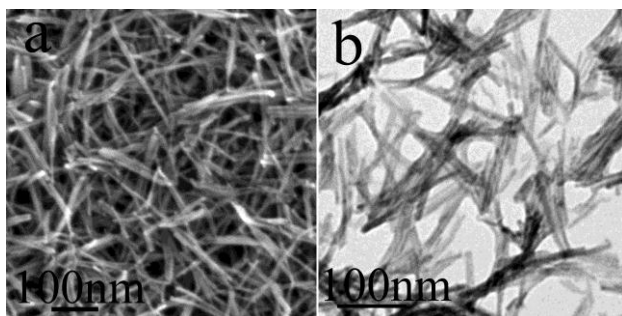

**Fig. S1** (a) SEM image of Cu(OH)<sub>2</sub> nanorods; (b) TEM image of Cu(OH)<sub>2</sub> nanorods

**Fig. S2** The results obtained by  $\text{Cu}(\text{OH})_2$  nanorods directly calcined at different temperatures

| Sample                            | Heat-treatment temperature( $^{\circ}\text{C}$ ) | The target products                                           |
|-----------------------------------|--------------------------------------------------|---------------------------------------------------------------|
| $\text{Cu}(\text{OH})_2$ nanorods | 50                                               | $\text{Cu}(\text{OH})_2$ nanorods                             |
|                                   | 100                                              | $\text{Cu}(\text{OH})_2$ nanorods                             |
|                                   | 200                                              | $\text{CuO}$ particles (most)+ $\text{CuO}$ nanorods (little) |
|                                   | 400                                              | $\text{CuO}$ particles                                        |

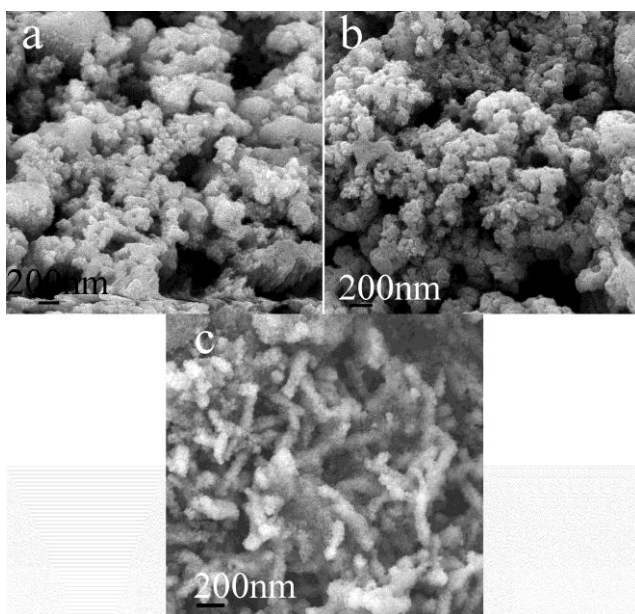

**Fig. S3** The SEM images of the three electrodes after cycling: (a) sample A; (b) sample B; (c) sample C.

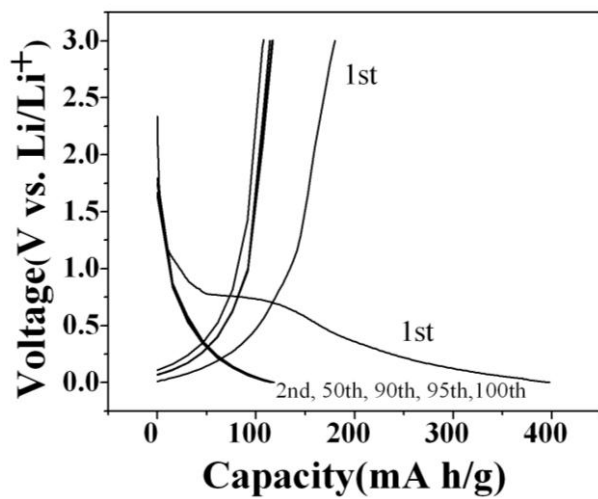

**Fig. S4** The discharge-charge profiles of acetylene black.
